# Supplementary material for: Restriction of Ce-MOF growth within ZSM zeolite for robust three-proofing thermoplastic polyurethane
Source: Royal Society of Chemistry journal article supplement (doi:10.1039/d4ta05441e), 2024-01-01
Supplement: d4ta05441e1.pdf [file d4ta05441e1.pdf]

## Supporting Information

### **Restriction of Ce-MOF growth within ZSM zeolite for robust three-proofing thermoplastic polyurethane**

Xue Bi<sup>a,d</sup>, Kunpeng Song<sup>a</sup>, Qianlong Li<sup>a</sup>, Tao Lin<sup>b</sup>, Ye-Tang Pan<sup>a\*</sup>, Wei Wang<sup>c</sup>, Jiyu He<sup>a\*</sup>, Rongjie Yang<sup>a,d</sup>

<sup>a</sup> *National Engineering Research Center of Flame Retardant Materials, School of Materials Science & Engineering, Beijing Institute of Technology, Beijing 100081, PR China.*

<sup>b</sup> *School Material Science & Engineering, Tsinghua University, Beijing 100084, Peoples R China.*

<sup>c</sup> *School of Computer Science and Engineering, The University of New South Wales, Sydney, New South Wales 2052, Australia.*

<sup>d</sup> *Zhongyuan Research Center for Flame Retardant Materials, Beijing Institute of Technology, Xuchang 461000, Henan, China.*

\*Corresponding author: Ye-Tang Pan; Jiyu He.

E-mail address: [pyt@bit.edu.cn](mailto:pyt@bit.edu.cn); [hejiyu@bit.edu.cn](mailto:hejiyu@bit.edu.cn)

## Characterization

X-ray diffraction (XRD) was employed on an X-ray diffractometer (DX-2600, Rigaku, Tokyo, Japan), using Cu K $\alpha$  radiation ( $K\lambda=1.5418 \text{ \AA}$ ), at a scanning rate of 0.01 °/s.

Scanning electron microscope (SEM) and Energy dispersive X-ray spectrometry were performed on a Regulus8230 (Hitachi, Japan) at the accelerating voltage of 15 kV. Electron Distribution Spectroscopy (EDS) was performed with X-Max (Oxford).

Transmission electron microscopy (TEM) was employed on a Tecnai G2 F20 S-TWIN (FEI, America) at 300 kV and a tungsten filament transmission electron microscope (JEM 1200EX, JEOL, Japan) operated at 100 kV. The carbon membrane support was supplied by Beijing Zhongjingkeyi Technology Co. Ltd.

X-Ray photoelectron spectroscopy (XPS) spectra was conducted by using an Thermo Scientific K-Alpha X-ray photoelectron spectrometer (Thermo Fisher Scientific).

The nitrogen sorption isotherms of the samples were examined using an ASAP 2460 analyzer (MICROMERITICS INSTRUMENT CORP, USA) employing the BET method.

Raman spectroscopy was studied the structure components of the residual char of PUA composites by a Renishaw in Via confocal microscope Raman system (Renishaw, UK) with a 633 nm laser source. The authors extend their gratitude to Mr. Shuai Xingpeng from Shiyanjia Lab ([www.shiyanjia.com](http://www.shiyanjia.com)) for providing invaluable assistance with the Raman analysis.

Thermogravimetric analysis (TGA) was performed by using a thermogravimetric analyzer (Mettler-Toledo, Zurich, Switzerland) with the specimen weight of 8 mg at a heating rate of 10°C/min under nitrogen.

Limiting oxygen index (LOI) was tested by g an oxygen index analyzer (Rheometric Scientific Ltd., Hampshire, UK) with the specimen dimension of 130 × 6.5 × 3 mm<sup>3</sup> according to ASTM D 2863 procedure.

Cone calorimeter test (cone) was performed to study the fire performance of PUA

composites according to the standard of ISO 5660 by a microscale combustion calorimeter (GOVMARKMCC-2) at a heat flux of 50 kW/m<sup>2</sup>.

Thermogravimetric analysis-infrared spectrometry (TG-IR) was performed using a STA 8000 thermogravimetric analyzer (Perkin Elmer) interfaced to the Frontier FT-IR spectrophotometer (Perkin Elmer) at a heating rate of 10°C/min under nitrogen. The FT-IR specimen cell was kept at 280°C.

The hardness of all TPU materials was assessed using a Shore hardness tester (HPE II, Bareiss) and averaged over the five points of each sample.

The contact angle of all fillers and TPU materials with water, as well as the contact angle of all fillers with ethylene glycol, was evaluated using a contact angle meter (Germany-Dataphysics-OCA20) and averaged the two points for each sample.

The UV-vis absorption spectra of TPU samples were measured using a UH4100 spectrometer (Hitachi, Japan) in the range of 200-900 nm at room temperature.

The mechanical properties of the splines were tested using an electronic tensile testing machine (DXLL-5000, Shanghai D & G Measure Instrument Co. Ltd., China) operated at a rate of 10 mm/min.

Differential scanning calorimetry (DSC) measurements were performed with DSC214 (NETZSCH, Germany) at a heating rate of 10°C/min and a cooling rate of 5°C/min. The specific test process is to raise the temperature to 250°C, then cool down to -100°C, and then increase the temperature to 250°C.

## **Results and discussions**

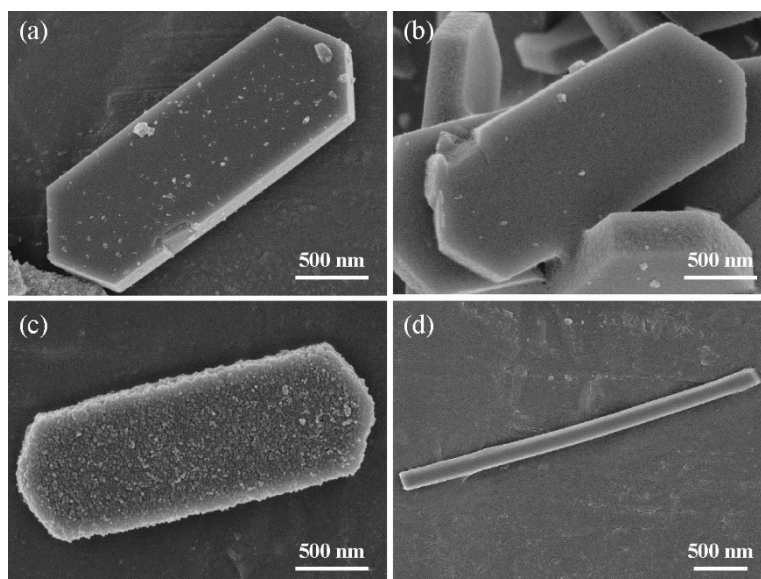

**Figure S1.** SEM image of (a) ZSM-5, (b) Ce@ZSM-5, (c) Ce-MOF@ZSM-5 and (d) Ce-MOF.

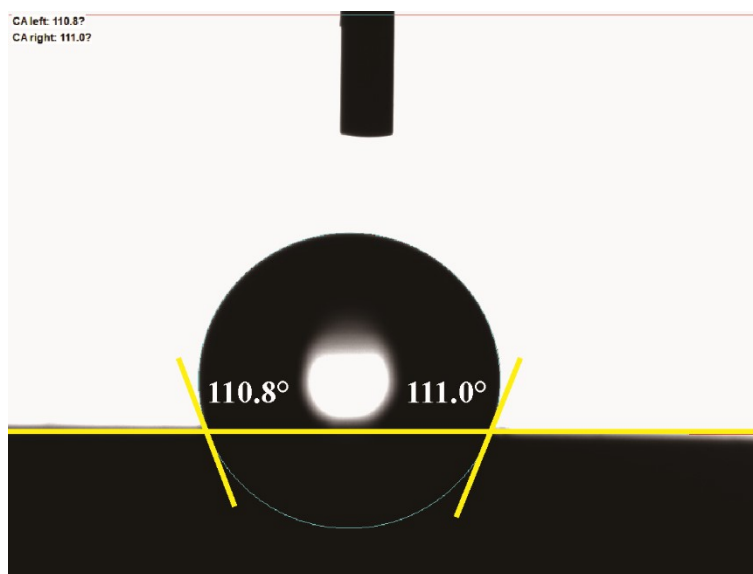

**Figure S2.** Water contact angles of pure TPU.

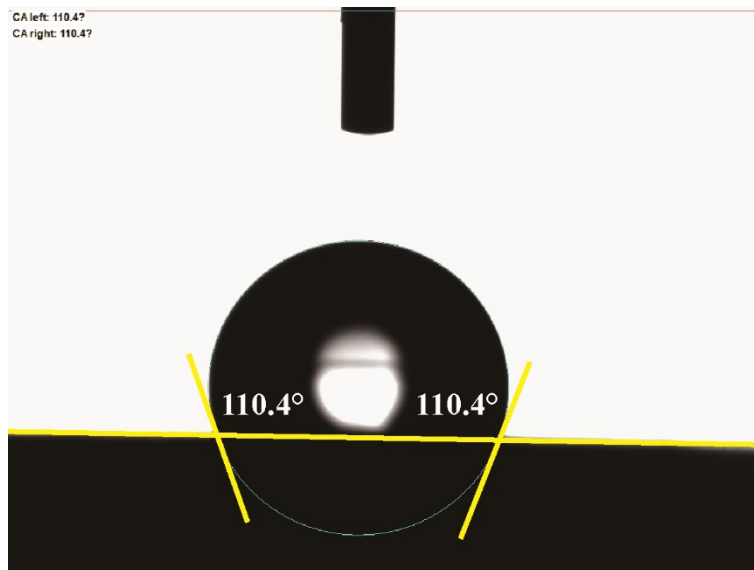

**Figure S3.** Water contact angles of TPU/ZSM-5.

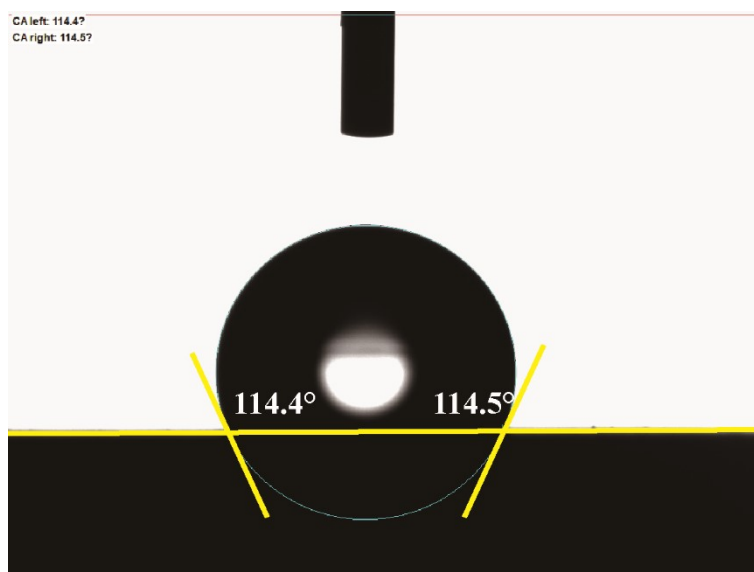

**Figure S4.** Water contact angles of TPU/Ce@ZSM-5.

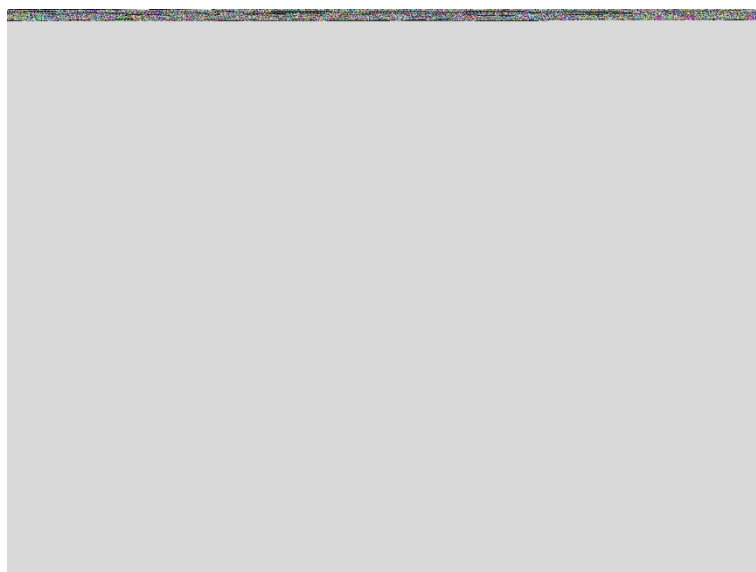

**Figure S5.** Water contact angles of TPU/Ce-MOF.

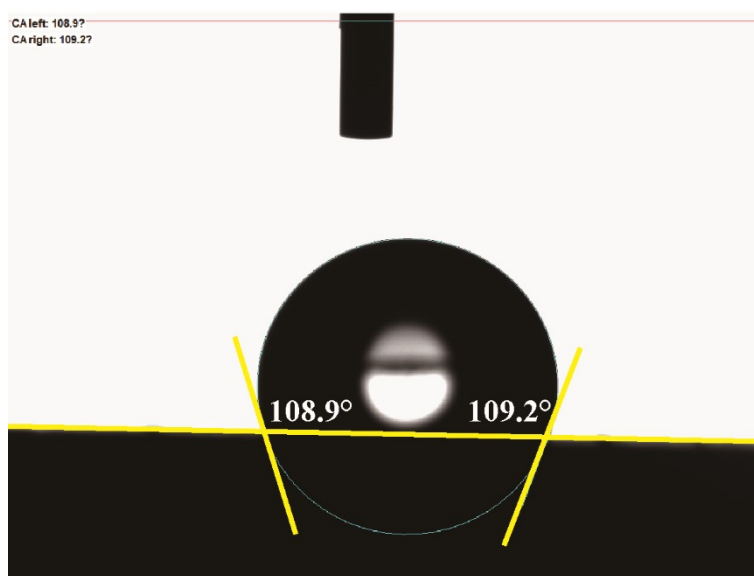

**Figure S6.** Water contact angles of TPU/Ce-MOF@ZSM-5.

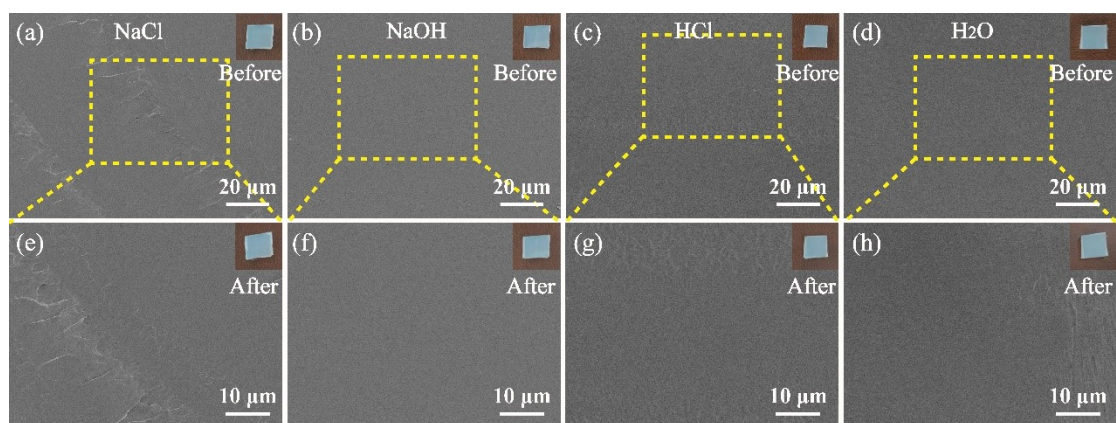

**Figure S7.** SEM image and enlarged SEM image of the fractured surface of pure TPU after 60 days of the chemical resistance test.

**Table S1.** Thermal decomposition data of hybrid materials in N<sub>2</sub>.

| Samples      | T <sub>5%</sub> (°C) | T <sub>max</sub> (°C) | R <sub>max</sub> (%/°C) | Char <sub>800°C</sub> (%) |
|--------------|----------------------|-----------------------|-------------------------|---------------------------|
| ZSM-5        | -                    | -                     | -                       | 95.6                      |
| Ce@ZSM-5     | 284.3                | -                     | -                       | 92.9                      |
| Ce-MOF       | 99.6                 | -4.16                 | 108.1                   | 55.6                      |
| Ce-MOF@ZSM-5 | 603.8                | -                     | -                       | 94.5                      |

**Table S2.** Contact angle data of TPU and TPU composites.

| Sample           | Contact angle (degrees) |
|------------------|-------------------------|
| pure TPU         | 110.9±2.6               |
| TPU/ZSM-5        | 110.4±1.7               |
| TPU/Ce@ZSM-5     | 114.4±2.1               |
| TPU/Ce-MOF       | 110.8±1.5               |
| TPU/Ce-MOF@ZSM-5 | 109.0±1.2               |

**Table S3.** Contact angle data and surface energy results for TPU and the hybrids.

| Sample       | Contact angle (degrees) |                               | $\gamma_{SV}^d$       | $\gamma_{SV}^p$       | $\gamma_{SV}$         | $\gamma_{12}$         |
|--------------|-------------------------|-------------------------------|-----------------------|-----------------------|-----------------------|-----------------------|
|              | $\theta_{(water)}$      | $\theta_{(ethylene\ glycol)}$ | (MJ·m <sup>-2</sup> ) | (MJ·m <sup>-2</sup> ) | (MJ·m <sup>-2</sup> ) | (MJ·m <sup>-2</sup> ) |
| pure TPU     | 110.9±2.6               | 89.7±1.5                      | 15.21                 | 0.53                  | 15.74                 | -                     |
| ZSM-5        | 18.6±0.3                | 26.7±0.2                      | 0.90                  | 86.64                 | 87.54                 | 82.33                 |
| Ce@ZSM-5     | 20.7±0.5                | 36.5±0.4                      | 0.04                  | 94.65                 | 94.69                 | 80.54                 |
| Ce-MOF       | 32.4±0.6                | 33.5±0.2                      | 1.66                  | 73.26                 | 74.92                 | 68.15                 |
| Ce-MOF@ZSM-5 | 29.9±1.1                | 31.9±0.3                      | 3.91                  | 67.64                 | 71.55                 | 59.89                 |

**Table S4.** Tensile strength and Elongation of TPU and TPU composites.

| Sample           | Tensile strength (MPa) | Elongation at the break (%) |
|------------------|------------------------|-----------------------------|
| pure TPU         | 28.58±1.08             | 432.05±15.26                |
| TPU/ZSM-5        | 24.52±1.06             | 338.86±10.24                |
| TPU/Ce@ZSM-5     | 22.68±0.95             | 335.29±11.08                |
| TPU/Ce-MOF       | 18.95±1.05             | 301.06±10.49                |
| TPU/Ce-MOF@ZSM-5 | 27.18±1.34             | 412.50±16.32                |

**Table S5.** Comparison of tensile strength and elongation at break TPU/Ce-



MOF@ZSM-5 nanocomposites with other TPU nanocomposites previously reported.

| Samples                                   | Contents | Tensile strength<br>(kW·m <sup>-2</sup> ) | Elongation at<br>break (MJ·m <sup>-2</sup> ) | Ref.      |
|-------------------------------------------|----------|-------------------------------------------|----------------------------------------------|-----------|
| TPU/f-Ti <sub>3</sub> C <sub>2</sub> -3.0 | 3 wt.%   | +31.2%                                    | -30.3%                                       | 1         |
| TPU/f-BN-5.0                              | 5 wt.%   | +39.4%                                    | -44.3%                                       | 2         |
| TPU/3.0 CPBN                              | 3 wt.%   | +38.1%                                    | -6.2%                                        | 3         |
| TPU/AHP/PMT                               | 10%      | /                                         | -24.3%                                       | 4         |
| TPU/15 wt.% DMPY                          | 15 wt.%  | -29.5%                                    | -31.9%                                       | 5         |
| PU/6.5APP/0.5ZIF-67@GO                    | 7%       | -25.9%                                    | -27.7%                                       | 6         |
| TPU/6AHP/1NiFe-LDH                        | 7%       | -6.0%                                     | -6.9%                                        | 7         |
| TPU/MXene@SiC@PANI                        | 5 wt.%   | -4.9%                                     | -4.5%                                        | This work |

**Table S6.** Shore hardness data of TPU and TPU composites.

| Sample               | 1    | 2    | 3    | 4    | 5    | Average<br>value |
|----------------------|------|------|------|------|------|------------------|
| pure TPU             | 90.6 | 90.1 | 90.4 | 90.8 | 90.3 | 90.4             |
| TPU/ZSM-5            | 92.7 | 92.5 | 92.5 | 92.8 | 92.4 | 92.6             |
| TPU/Ce@ZSM<br>-5     | 92.1 | 92.3 | 92.4 | 91.8 | 92.5 | 92.2             |
| TPU/Ce-MOF           | 91.7 | 91.8 | 92.3 | 92.1 | 91.7 | 91.9             |
| TPU/Ce-<br>MOF@ZSM-5 | 92.6 | 92.2 | 91.9 | 92.4 | 92.1 | 92.2             |

**Table S7.** Thermal decomposition data of TPU and TPU composites after 12 h UV

irradiation.

| Samples          | T <sub>5%</sub> (°C) | T <sub>max</sub> (°C) | R <sub>max</sub> (%/°C) | Char <sub>800°C</sub> (%) |
|------------------|----------------------|-----------------------|-------------------------|---------------------------|
| pure TPU         | 290.5                | 401.8                 | -1.07                   | 7.1                       |
| TPU/ZSM-5        | 294.8                | 406.7                 | -1.17                   | 13.2                      |
| TPU/Ce@ZSM-5     | 293.3                | 408.7                 | -1.02                   | 11.2                      |
| TPU/Ce-MOF       | 295.0                | 402.2                 | -1.27                   | 10.6                      |
| TPU/Ce-MOF@ZSM-5 | 291.8                | 411.3                 | -1.00                   | 15.1                      |

**Table S8.** Tensile strength and Elongation of TPU and TPU composites after 12 h UV irradiation.

| Sample           | Tensile strength (MPa) | Elongation at the break (%) | Retention of tensile strength (%) | Retention of elongation at break (%) |
|------------------|------------------------|-----------------------------|-----------------------------------|--------------------------------------|
| pure TPU         | 8.03±0.59              | 109.09±10.34                | 28.10                             | 25.25                                |
| TPU/ZSM-5        | 22.81±1.16             | 328.49±15.27                | 93.03                             | 96.94                                |
| TPU/Ce@ZSM-5     | 19.71±0.86             | 291.85±11.05                | 86.90                             | 87.04                                |
| TPU/Ce-MOF       | 12.06±0.49             | 132.80±5.48                 | 63.64                             | 44.11                                |
| TPU/Ce-MOF@ZSM-5 | 26.88±1.35             | 401.21±16.29                | 98.89                             | 97.74                                |

**Table S9.** Weight changes curves of pure TPU in 3.5 wt.% NaCl aqueous solution, 3.5 wt.% NaOH aqueous solution, 3.5 wt.% HCl solution and deionized water.

| Times (day) | NaCl (wt. %) | NaOH (wt. %) | HCl (wt. %) | H <sub>2</sub> O (wt. %) |
|-------------|--------------|--------------|-------------|--------------------------|
| 10          | 1.318        | 1.353        | 1.311       | 1.266                    |
| 20          | 2.031        | 2.297        | 2.265       | 1.931                    |
| 30          | 2.405        | 2.861        | 2.772       | 2.293                    |
| 40          | 2.637        | 3.133        | 3.032       | 2.566                    |
| 50          | 2.812        | 3.253        | 3.231       | 2.698                    |
| 60          | 2.926        | 3.371        | 3.313       | 2.808                    |

**Table S10.** Weight changes curves of TPU/Ce-MOF@ZSM-5 in 3.5 wt.% NaCl aqueous solution, 3.5 wt.% NaOH aqueous solution, 3.5 wt.% HCl solution and deionized water.

| Times (day) | NaCl (wt. %) | NaOH (wt. %) | HCl (wt. %) | H <sub>2</sub> O (wt. %) |
|-------------|--------------|--------------|-------------|--------------------------|
| 10          | 0.787        | 0.792        | 0.821       | 0.572                    |
| 20          | 1.126        | 1.292        | 1.329       | 0.953                    |
| 30          | 1.448        | 1.721        | 1.652       | 1.410                    |
| 40          | 1.764        | 1.984        | 1.973       | 1.702                    |
| 50          | 1.895        | 2.229        | 2.232       | 1.922                    |
| 60          | 2.003        | 2.310        | 2.391       | 2.030                    |

**Table S11.** Thermal decomposition data of TPU and TPU composites.

| Samples          | T <sub>5%</sub> (°C) | T <sub>max</sub> (°C) | R <sub>max</sub> (%/°C) | Char <sub>800°C</sub> (%) |
|------------------|----------------------|-----------------------|-------------------------|---------------------------|
| pure TPU         | 290.5                | 407.8                 | -1.00                   | 8.2                       |
| TPU/ZSM-5        | 293.3                | 417.3                 | -0.96                   | 13.8                      |
| TPU/Ce@ZSM-5     | 294.8                | 416.3                 | -1.01                   | 12.4                      |
| TPU/Ce-MOF       | 295.0                | 407.8                 | -1.01                   | 11.2                      |
| TPU/Ce-MOF@ZSM-5 | 291.8                | 409.3                 | -0.98                   | 15.3                      |

**Table S12.** Combustion parameters after cone of TPU and TPU composites.

| Samples                   | pure TPU      | TPU/ZSM-5     | TPU/Ce@ZSM-5  | TPU/Ce-MOF    | TPU/ Ce-MOF@ZSM-5 |
|---------------------------|---------------|---------------|---------------|---------------|-------------------|
| LOI (%)                   | 21.2          | 23.2          | 23.0          | 23.5          | 24.3              |
| pHRR (kW/m <sup>2</sup> ) | 1124±31       | 931±19        | 1019±27       | 1071±25       | 832±16            |
| THR (MJ/m <sup>2</sup> )  | 87±9          | 78±7          | 78±6          | 83±7          | 69±5              |
| pSPR (m <sup>2</sup> /kg) | 0.164±0.011   | 0.121±0.008   | 0.122±0.009   | 0.111±0.007   | 0.107±0.008       |
| TSP (m <sup>2</sup> )     | 14.66±0.6     | 12.98±0.7     | 11.35±0.4     | 12.41±0.5     | 10.93±0.5         |
| tpSPR (s)                 | 105±7         | 125±5         | 100±5         | 100±4         | 95±6              |
| pCOP (g/s)                | 0.0129±0.0010 | 0.0089±0.0009 | 0.0094±0.0007 | 0.0095±0.0004 | 0.0078±0.0005     |
| pCO <sub>2</sub> P (g/s)  | 0.74±0.12     | 0.54±0.08     | 0.62±0.05     | 0.64±0.10     | 0.53±0.06         |
| Residue (%)               | 3.5±0.5       | 10.4±1.2      | 16.3±1.2      | 9.2±0.7       | 25.1±1.9          |

**Table S13.** Comparison of heat release, smoke release of TPU/Ce-MOF@ZSM-5

nanocomposites with other TPU nanocomposites previously reported.

| Samples                                          | Contents | pHRR<br>(kW/m <sup>2</sup> ) | THR<br>(MJ/m <sup>2</sup> ) | pSPR<br>(m <sup>2</sup> /kg) | TSP<br>(m <sup>2</sup> ) | Ref.      |
|--------------------------------------------------|----------|------------------------------|-----------------------------|------------------------------|--------------------------|-----------|
| Co@PCN-TPU                                       | 3 wt.%   | -16.4%                       | -11.2%                      | -21.8%                       | /                        | 8         |
| CNPPy-TPU                                        | 3%       | -29.8%                       | -28.3%                      | -28.7%                       | -24.2%                   | 9         |
| TPU/BNNO@Co <sub>3</sub> O <sub>4</sub> @P<br>PZ | 2 wt.%   | -44.1%                       | -10.4%                      | -51.2%                       | -20.4%                   | 10        |
| TPU/MXene@<br>SnO <sub>2</sub> -2                | 2 wt.%   | -50.5%                       | -9.7%                       | -35.1%                       | -16.3%                   | 11        |
| SW-Si <sub>3</sub> N <sub>4</sub> /TPU           | 3%       | -27.4%                       | -28.2%                      | /                            | /                        | 12        |
| Co <sub>3</sub> O <sub>4</sub> -GNS              | 2 wt.%   | -16.4%                       | /                           | /                            | /                        | 13        |
| TPU/Ce-MOF@ZSM-5                                 | 5 wt.%   | -26.0%                       | -20.7%                      | -34.8%                       | -25.4%                   | This work |

**Table S14.** Thermal decomposition data of TPU composites.

| Samples          | C-C/C-H area (%) | C-O area (%) | C=O area (%) | Cox/Ca |
|------------------|------------------|--------------|--------------|--------|
| Pure TPU         | 55.58            | 25.54        | 18.89        | 79.94  |
| TPU/Ce-MOF@ZSM-5 | 57.85            | 25.93        | 16.23        | 72.88  |

1. L. He, J. Wang, B. Wang, X. Wang, X. Zhou, W. Cai, X. Mu, Y. Hou, Y. Hu and L. Song, *Compos. B. Eng.*, 2019, **179**, 107486.

2. W. Cai, N. Hong, X. Feng, W. Zeng, Y. Shi, Y. Zhang, B. Wang and Y. Hu, *Chem. Eng. J.*, 2017, **330**, 309-321.
3. J. Wang, D. Zhang, Y. Zhang, W. Cai, C. Yao, Y. Hu and W. Hu, *J. Hazard. Mater.*, 2019, **362**, 482-494.
4. X. Liu, J. Guo, W. Tang, H. Li, X. Gu, J. Sun and S. Zhang, *Compos. Part A Appl. Sci. Manuf.*, 2019, **119**, 291-298.
5. L. Liu, Y. Xu, Y. He, M. Xu, Z. Shi, H. Hu, Z. Yang and B. Li, *Polym. Degrad. Stab.*, 2019, **167**, 146-156.
6. Q. Liu, H. Wang, H. Li, J. Sun, X. Gu and S. Zhang, *Polym. Adv. Technol.*, 2022, **33**, 2374-2385.
7. S. Xu, J. Liu, X. Liu, H. Li, X. Gu, J. Sun and S. Zhang, *Polym. Degrad. Stab.*, 2022, **202**, 110043.
8. E. Szliszka, Z. P. Czuba, M. Domino, B. Mazur, G. Zydowicz and W. Krol, *Molecules*, 2009, **14**, 738-754.
9. S. Lu, H. Shi, B. Shen, W. Hong, D. Yu and X. Chen, *J. Polym. Res.*, 2022, **29**, 263.
10. Y. Tong, W. Wu, W. Zhao, Y. Xing, H. Zhang, C. Wang, T. B. Y. Chen, A. C. Y. Yuen, B. Yu, X. Cao and X. Yi, *Polymers*, 2022, **14**, 4341.
11. W. Cai, Z. Li, T. Cui, X. Feng, L. Song, Y. Hu and X. Wang, *Composites Part B: Engineering*, 2022, **244**, 110204.
12. L. Cheng, J. Wang, S. Qiu, J. Wang, Y. Zhou, L. Han, B. Zou, Z. Xu, Y. Hu and C. Ma, *J. Colloid Interface Sci.*, 2021, **603**, 844-855.
13. K. Zhou, Z. Gui, Y. Hu, S. Jiang and G. Tang, *Compos. Part A Appl. Sci. Manuf.*, 2016, **88**, 10-18.
